# Supplementary material for: The Effects of Drought and Re-Watering on Non-Structural Carbohydrates of Pinus tabulaeformis Seedlings
Source: MDPI journal article supplement (doi:10.3390/biology10040281), 2021-03-30
Supplement: s1 [file s1]

# The Effects of Drought and Re-watering on Non-structural Carbohydrates of *Pinus tabulaeformis* Seedlings

Xinyi Guo, Changhui Peng, Tong Li, Jingjing Huang, Hanxiong Song, Qiuhan Zhu and Meng Wang

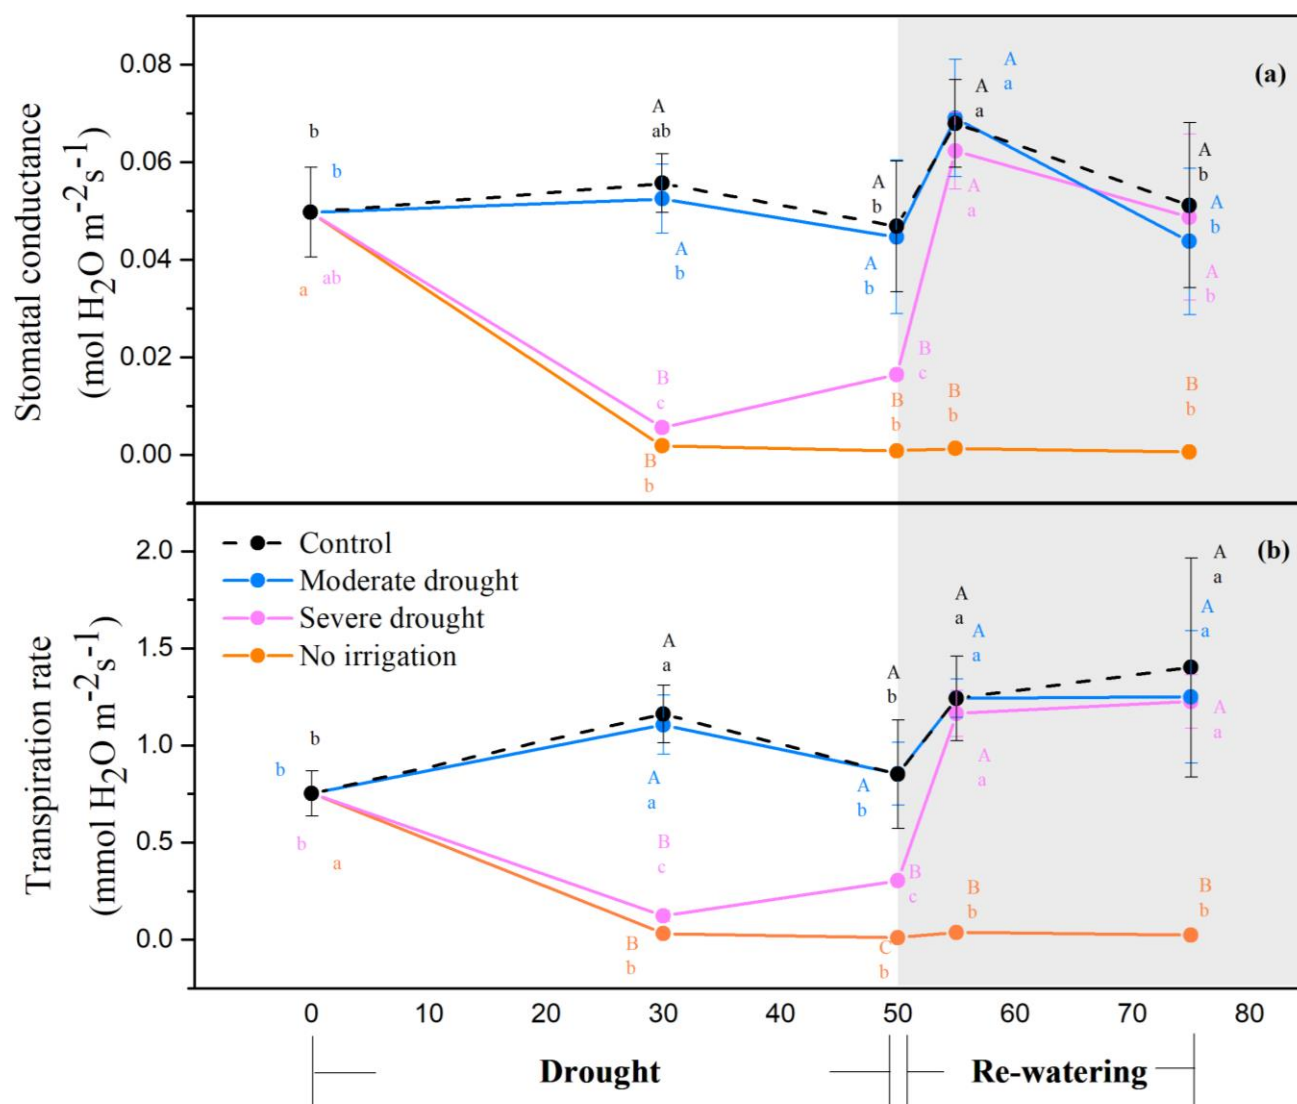

**Figure S1.** Stomatal conductance (a), and transpiration rate (b) during drought (0–50 days) and the subsequent re-watering (50–75 days) for *P. tabulaeformis* seedlings in the control (black line), moderate drought (blue line), severe drought (purple line), and no irrigation (orange line) groups. Values are means  $\pm$  SD ( $n = 4$ ). The different uppercase letters represent the significant difference among the four treatments (including control) at the same sampling day. The different lowercase letters represent the significant differences between the sampling days under the same treatment.

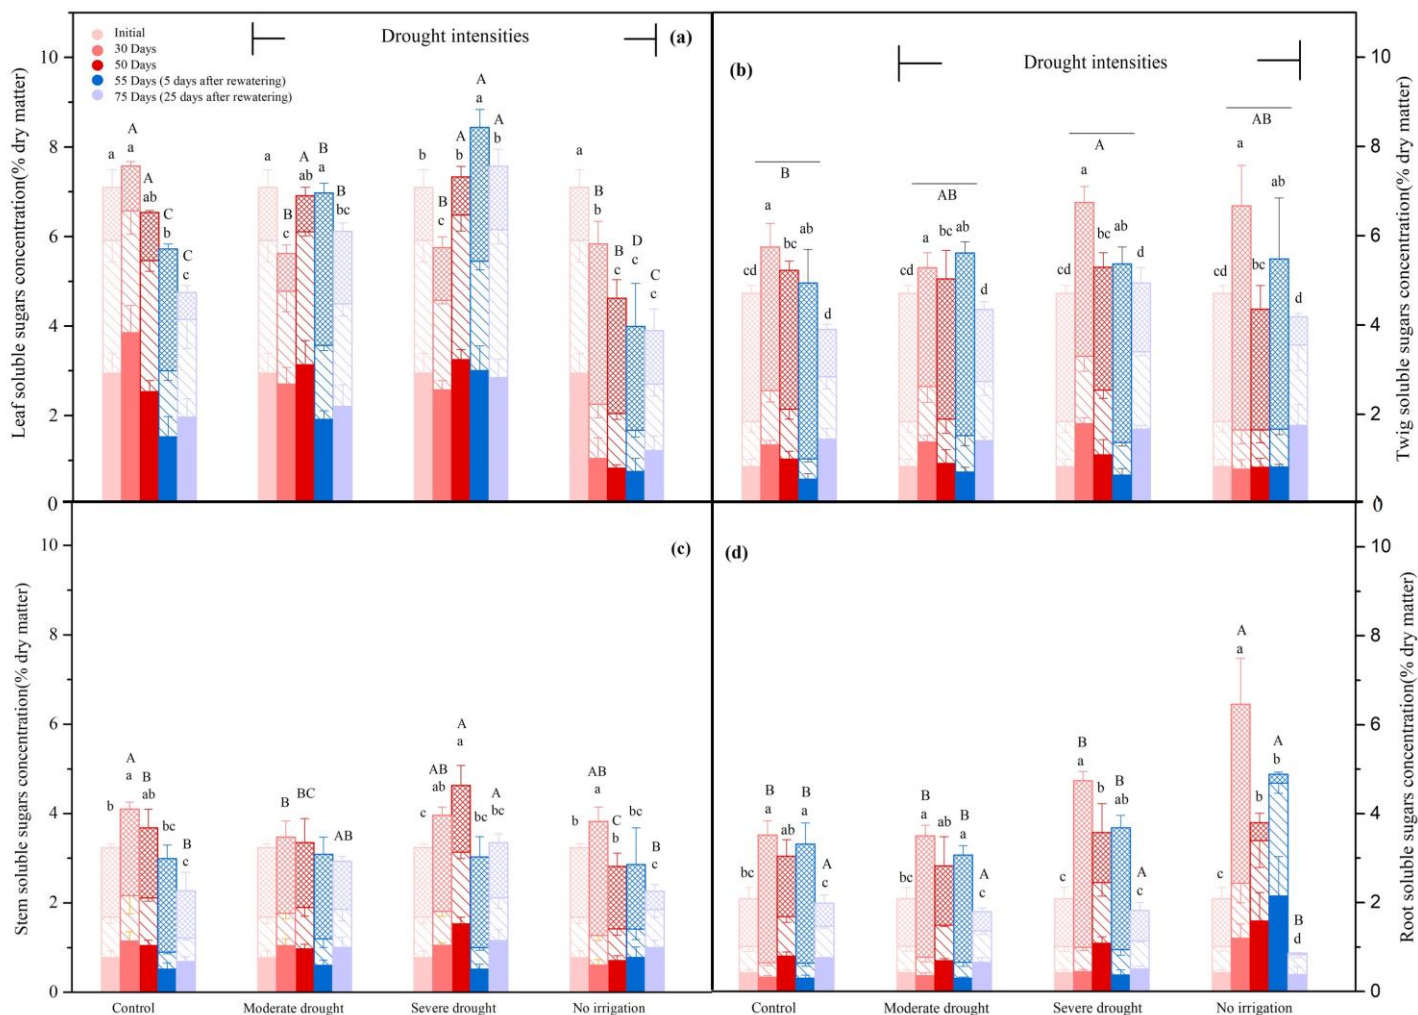

**Figure S2.** Soluble sugars concentration in the leaves(a), twigs(b), stems(c) and roots(d) during drought (0-50 days) and the subsequent rewatering (50-75 days) for *P. tabulaeformis* seedlings in the control, moderate drought, severe drought, and no irrigation groups. The color filled rectangle in each histogram represents the glucose concentration, the slash filled rectangle represents the fructose concentration, and the grid filled rectangle represents the sucrose concentration. In this study, soluble sugar is considered as the sum of glucose, fructose, and sucrose. Values are the means  $\pm$  SD ( $n = 4$ ). The different uppercase letters represent the significant difference among the four treatments (including control) on the same sampling day. The different lowercase letters represent the significant differences between the sampling days under the same treatment.

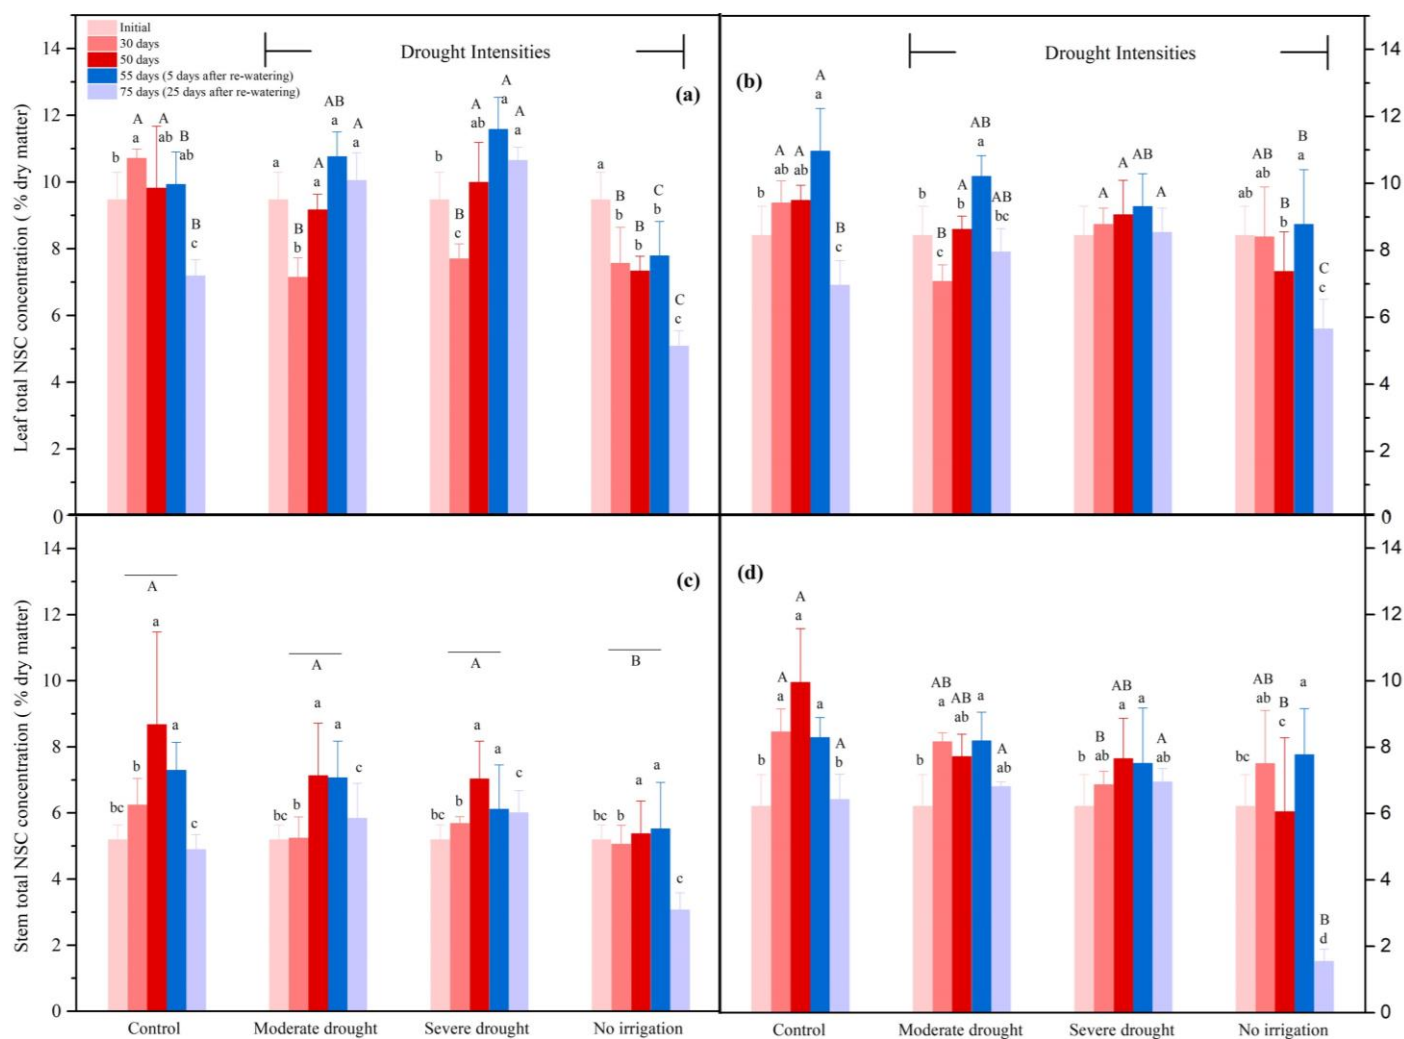

**Figure S3.** Total NSC concentration in the leaves(a), twigs(b), stems(c) and roots(d) during drought (0-50 days) and the subsequent rewatering (50-75 days) for *P. tabulaeformis* seedlings in the control, moderate drought, severe drought, and no irrigation groups. Values are the means  $\pm$  SD ( $n = 4$ ). The different uppercase letters represent the significant difference among the four treatments (including control) on the same sampling day. The different lowercase letters represent the significant differences between the sampling days under the same treatment.

**Table S1.** Soil water content (%) in the four treatments (including control) of *P. tabulaeformis* seedlings during drought (0-50 days) and subsequent re-watering (50-75 days). Values are the means  $\pm$  SD ( $n = 4$ ).

| Treatment        | 0 day<br>(Initial) | 30 days     | 50 days     | 55 days<br>(5 days after re-watering) | 75 days<br>(25 days after re-watering) |
|------------------|--------------------|-------------|-------------|---------------------------------------|----------------------------------------|
| Control          | 25.04(0.91)        | 26.39(1.05) | 25.43(1.41) | 25.00(1.64)                           | 25.55(.55)                             |
| Moderate drought | 25.04(0.91)        | 13.28(2.42) | 10.92(0.96) | 25.34(1.87)                           | 26.73(4.15)                            |
| Severe drought   | 25.04(0.91)        | 4.05(0.59)  | 4.56(1.04)  | 25.23(0.35)                           | 26.32(0.13)                            |
| No irrigation    | 25.04(0.91)        | 1.25(0.13)  | 1.12(0.03)  | 26.58(0.08)                           | 28.25(0.92)                            |

**Table S2.** *F*-statistic and probabilities (*P*) from repeated-measure analysis of variance on glucose, fructose, sucrose, soluble sugar, starch, total non-structural carbohydrate (NSC) and the ratio of soluble sugar to starch (soluble sugar : starch) in different seedling tissues. Columns present the *F* and *P* values of drought intensity, duration and intensity-duration interaction (drought intensity  $\times$  duration).

| Variables | Tissues | Drought intensity |          | Duration |          | Drought intensity $\times$ Duration |          |
|-----------|---------|-------------------|----------|----------|----------|-------------------------------------|----------|
|           |         | <i>F</i>          | <i>P</i> | <i>F</i> | <i>P</i> | <i>F</i>                            | <i>P</i> |

|                       |        |        |         |         |         |        |         |
|-----------------------|--------|--------|---------|---------|---------|--------|---------|
| Glucose               | leaves | 37.522 | < 0.001 | 22.338  | < 0.001 | 10.968 | < 0.001 |
|                       | twigs  | 7.034  | 0.006   | 46.754  | < 0.001 | 4.106  | < 0.001 |
|                       | stems  | 21.389 | < 0.001 | 19.176  | < 0.001 | 6.431  | < 0.001 |
|                       | roots  | 20.531 | < 0.001 | 13.742  | < 0.001 | 10.701 | < 0.001 |
| Fructose              | leaves | 71.449 | < 0.001 | 31.287  | < 0.001 | 6.021  | < 0.001 |
|                       | twigs  | 3.613  | 0.046   | 20.447  | < 0.001 | 2.119  | 0.033   |
|                       | stems  | 4.724  | 0.021   | 21.152  | < 0.001 | 5.840  | < 0.001 |
|                       | roots  | 48.172 | < 0.001 | 31.263  | < 0.001 | 23.429 | < 0.001 |
| Sucrose               | leaves | 25.039 | < 0.001 | 53.144  | < 0.001 | 14.157 | < 0.001 |
|                       | twigs  | 1.061  | 0.402   | 60.225  | < 0.001 | 4.309  | 0.005   |
|                       | stems  | 1.660  | 0.228   | 24.773  | < 0.001 | 2.502  | 0.012   |
|                       | roots  | 14.311 | < 0.001 | 135.578 | < 0.001 | 11.022 | < 0.001 |
| Soluble sugar         | leaves | 21.218 | < 0.001 | 9.923   | < 0.001 | 9.435  | < 0.001 |
|                       | twigs  | 2.707  | 0.092   | 13.054  | < 0.001 | 1.318  | 0.285   |
|                       | stems  | 5.478  | 0.013   | 14.219  | < 0.001 | 2.260  | 0.023   |
|                       | roots  | 6.572  | 0.007   | 50.562  | < 0.001 | 4.659  | 0.001   |
| Starch                | leaves | 14.041 | < 0.001 | 15.117  | < 0.001 | 5.623  | 0.001   |
|                       | twigs  | 16.603 | < 0.001 | 35.201  | < 0.001 | 5.163  | < 0.001 |
|                       | stems  | 15.254 | < 0.001 | 15.452  | < 0.001 | 1.828  | 0.143   |
|                       | roots  | 81.858 | < 0.001 | 12.909  | < 0.001 | 13.511 | < 0.001 |
| Total NSC             | leaves | 28.888 | < 0.001 | 13.033  | < 0.001 | 10.755 | < 0.001 |
|                       | twigs  | 12.253 | 0.001   | 14.215  | < 0.001 | 3.282  | 0.002   |
|                       | stems  | 9.994  | 0.001   | 10.799  | < 0.001 | 1.816  | 0.125   |
|                       | roots  | 15.978 | < 0.001 | 36.825  | < 0.001 | 18.944 | < 0.001 |
| Soluble sugar: starch | leaves | 5.453  | 0.013   | 12.374  | < 0.001 | 3.490  | 0.008   |
|                       | twigs  | 17.240 | < 0.001 | 31.270  | < 0.001 | 3.443  | 0.022   |
|                       | stems  | 26.882 | < 0.001 | 28.115  | < 0.001 | 3.452  | 0.001   |
|                       | roots  | 39.121 | < 0.001 | 19.478  | < 0.001 | 8.562  | 0.001   |
